# Supplementary material for: Time-to-Treatment of Oral Cancer and Potentially Malignant Oral Disorders: Findings in Malaysian Public Healthcare
Source: MDPI journal article supplement (doi:10.3390/dj10110199), 2022-10-24
Supplement: s1 [file s1]

**Table S1.** Differences in the patient interval (in days) based on sociodemographic and clinical factors.

| Characteristic          |                     | <i>n</i> | Interval<br>Median (IQR)<br>(In Days) | <i>p</i> -Value <sup>1</sup> |
|-------------------------|---------------------|----------|---------------------------------------|------------------------------|
| <b>Age</b>              | <60                 | 49       | 63 (21–181)                           | 0.975                        |
|                         | >60                 | 51       | 61 (21–180)                           |                              |
| <b>Gender</b>           | Male                | 39       | 60 (19–102)                           | 0.157                        |
|                         | Female              | 61       | 90 (27–181)                           |                              |
| <b>Race</b>             | Malay               | 21       | 66 (30–150)                           | 0.690                        |
|                         | Chinese             | 19       | 60 (21–360)                           |                              |
|                         | Indian              | 50       | 76 (23–180)                           |                              |
|                         | Indigenous          | 10       | 42 (9–92)                             |                              |
| <b>Location</b>         | Urban               | 46       | 60 (19–181)                           | 0.566                        |
|                         | Rural               | 54       | 90 (21–180)                           |                              |
| <b>Education</b>        | None/Primary        | 45       | 63 (30–181)                           | 0.224                        |
|                         | Secondary/Tertiary  | 55       | 61 (18–120)                           |                              |
| <b>Occupation</b>       | Not employed        | 43       | 90 (16–183)                           | 0.409                        |
|                         | Employed/Retired    | 57       | 61 (27–102)                           |                              |
| <b>Household income</b> | ≤MYR 4360           | 90       | 63 (21–181)                           | 0.428                        |
|                         | >MYR 4360           | 10       | 57 (21–90)                            |                              |
| <b>Anatomic site</b>    | Buccal mucosa       | 54       | 70 (19–181)                           | 0.182                        |
|                         | Tongue              | 25       | 66 (33–120)                           |                              |
|                         | Others <sup>2</sup> | 21       | 31 (15–92)                            |                              |
| <b>Diagnosis</b>        | OPMD                | 50       | 72 (19–120)                           | 0.820                        |
|                         | Oral Cancer         | 47       | 61 (21–183)                           |                              |

<sup>1</sup> Significant difference in patient interval between OPMD and oral cancer based on the Kruskal-Wallis H test with significance set to  $p < 0.05$ . <sup>2</sup> Consists of the alveolar, gingiva, lip, floor of mouth, palate, mandible, and other sites.
