# Supplementary material for: Time-to-Treatment of Oral Cancer and Potentially Malignant Oral Disorders: Findings in Malaysian Public Healthcare
Source: MDPI journal article supplement (doi:10.3390/dj10110199), 2022-10-24
Supplement: s1 [file s1]

**Table S2.** Awareness and health-seeking behaviors of respondents.

| Factors                                               | %    | Interval<br>Median (IQR)<br>(In Days) | p-Value            |
|-------------------------------------------------------|------|---------------------------------------|--------------------|
| Ever heard about oral cancer before diagnosis?        |      |                                       |                    |
| Yes                                                   | 59.6 | 60 (15–180)                           | 0.861 <sup>1</sup> |
| No                                                    | 40.4 | 60 (23–150)                           |                    |
| Are dentists trained for oral cancer screening?       |      |                                       |                    |
| Yes                                                   | 53.5 | 60 (15–120)                           | 0.595 <sup>1</sup> |
| No                                                    | 46.5 | 60 (15–180)                           |                    |
| If attended annual dental check-ups before diagnosis? |      |                                       |                    |
| Yes                                                   | 16.5 | 51 (23–90)                            | 0.453 <sup>1</sup> |
| No                                                    | 83.5 | 60 (15–180)                           |                    |
| Type of first primary healthcare professional seen    |      |                                       |                    |
| Dentist                                               | 43.9 | 0 (0–7)                               | 0.730 <sup>2</sup> |
| Medical officer                                       | 56.1 | 0 (0–8)                               |                    |

<sup>1</sup> Kruskal-Wallis H test to detect differences in T<sub>1</sub>, with significance set to  $p < 0.05$ . <sup>2</sup> Kruskal-Wallis H test to detect differences in T<sub>2</sub>, with significance set to  $p < 0.05$ .
